# Supplementary material
Source: publisher figshare collection journal article supplement (https://acs.figshare.com/ndownloader/files/4171747)
Supplement: Supplementary file 1 [file 4171747]

# **Chiral Phosphapalladacycle as Efficient Catalysts for the Asymmetric Hydrophosphination of substituted methylidenemalonate esters – Direct Access to Functionalized Tertiary Chiral Phosphines**

Chang Xu,<sup>a</sup> Gan Jun Hao Kennard,<sup>a</sup> Felix Hennersdorf,<sup>b</sup> Yongxin Li,<sup>a</sup> Sumod A. Pullarkat<sup>a,\*</sup> and Pak-Hing Leung<sup>a,\*</sup>

<sup>a</sup> Division of Chemistry & Biological Chemistry, School of Physical and Mathematical Sciences, Nanyang Technological University, Singapore 637616, Singapore Fax: (+65) 6791-1961; e-mail:sumod@ntu.edu.sg, pakhing@ntu.edu.sg.

<sup>b</sup> Institute of Inorganic Chemistry, Faculty of Chemistry and Mineralogy, University of Leipzig, Johannisalle 29, D-04103, Leipzig, Germany

## **Supporting Information**

### **Table of Contents**

|                              |                |
|------------------------------|----------------|
| <b>General information</b>   | <b>S2</b>      |
| <b>Experimental sections</b> | <b>S3-S9</b>   |
| <b>Reference</b>             | <b>S10</b>     |
| <b>NMR spectra</b>           | <b>S11-S26</b> |
| <b>Crystallographic Data</b> | <b>S27</b>     |

## General information

All reactions and manipulations were carried out under dry, oxygen-free nitrogen using the standard Schlenk technique. NMR spectra were recorded on a Bruker AV 300 spectrometer ( $^1\text{H}$  at 300 MHz,  $^{13}\text{C}$  at 75 MHz,  $^{31}\text{P}$  at 121 MHz) or a Bruker AV 400 ( $^1\text{H}$  at 400 MHz,  $^{13}\text{C}$  at 100 MHz,  $^{31}\text{P}$  at 162 MHz) or a Bruker AV 500 ( $^1\text{H}$  at 500 MHz,  $^{13}\text{C}$  at 125 MHz,  $^{31}\text{P}$  at 202 MHz). Chemical shift are given in ppm and are referenced to residual solvent peak in the respective deuterio-solvents. ( $^1\text{H}$  NMR and  $^{13}\text{C}$  NMR) or to an 85%  $\text{H}_3\text{PO}_4$  in  $\text{D}_2\text{O}$  externally ( $^{31}\text{P}$  NMR). Solvents were degassed prior to use when necessary. DCM, Toluene, THF and acetone were purchased from TEDIA COMPANY (AR) and used as supplied. Low Temp PAIRSTIRRER PSL-1800 machine was used for controlling low temperatures for reactions. Column chromatography was conducted on Silica gel 60 (Merck). Optical rotations of the free phosphine products were measured as soon as possible without inert gas protection on the specified solution in a 0.1 dm cell at 20 °C with a Perkin-Elmer 341 polarimeter. Melting points were measured using the SRS Optimelt Automated Melting Point System, SRS MPA100.

The three palladacycles catalysts (*R*)-**1**, (*S*)-**2**, and (*R*)-**3** were prepared by were prepared by treating the corresponding chloro-bridged dimeric palladium compounds<sup>1</sup> with silver perchlorate in acetonitrile via a procedure reported previously for (*R*)-**1**<sup>2a</sup> and (*R*)-**3**.<sup>2b</sup> All the other reactants and reagents were used as supplied.

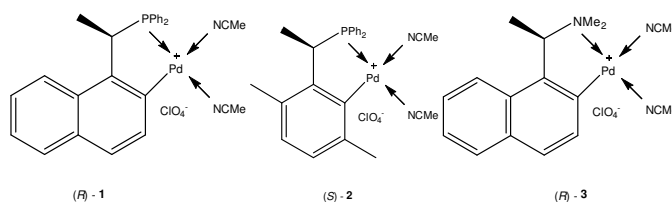

Figure 1.

## Experimental Section:

### 1) Screening of reaction conditions:

**Table 1.** Screening of reaction conditions.<sup>a</sup>

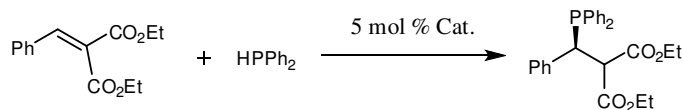

| Entry | Cat            | Solvent                       | Base                         | Temp (°C) | Reactivity (hrs) | Conversion <sup>b</sup> (%) | ee <sup>c</sup> (%) |
|-------|----------------|-------------------------------|------------------------------|-----------|------------------|-----------------------------|---------------------|
| 1     | ( <i>R</i> )-1 | DCM                           | NEt <sub>3</sub>             | RT        | 1.5              | 99                          | 63                  |
| 2     | ( <i>R</i> )-1 | DCM                           | NEt <sub>3</sub>             | -80       | 3.5              | 99                          | 96                  |
| 3     | ( <i>S</i> )-2 | DCM                           | NEt <sub>3</sub>             | -80       | 24               | 99                          | 65                  |
| 4     | ( <i>R</i> )-3 | DCM                           | NEt <sub>3</sub>             | -80       | 7                | 99                          | 86                  |
| 5     | ( <i>S</i> )-1 | DCM                           | NEt <sub>3</sub>             | -80       | 3.5              | 99                          | 96                  |
| 6     | ( <i>R</i> )-1 | DCM                           | NEt <sub>3</sub>             | -40       | 2.5              | 99                          | 93                  |
| 7     | ( <i>R</i> )-1 | Acetone                       | NEt <sub>3</sub>             | -80       | > 6              | 99                          | 95                  |
| 8     | ( <i>R</i> )-1 | MeCN                          | NEt <sub>3</sub>             | -40       | 4                | 99                          | 81                  |
| 9     | ( <i>R</i> )-1 | Chloroform                    | NEt <sub>3</sub>             | -40       | 24               | 99                          | 85                  |
| 10    | ( <i>R</i> )-1 | THF                           | NEt <sub>3</sub>             | -80       | NIL              | NIL                         | NIL                 |
| 11    | ( <i>R</i> )-1 | 1, 4-dioxane : Water = 10 : 1 | NEt <sub>3</sub>             | RT        | 10               | 83                          | 18                  |
| 12    | ( <i>R</i> )-1 | Toluene                       | NEt <sub>3</sub>             | -80       | > 24             | NIL                         | NIL                 |
| 13    | ( <i>R</i> )-1 | DCM                           | DBU                          | -80       | 24               | 35                          | --                  |
| 14    | ( <i>R</i> )-1 | DCM                           | <i>t</i> -BuONa <sup>d</sup> | -40       | 5.5              | 99                          | 36                  |

<sup>a</sup> Conditions: HPPH<sub>2</sub> (50.0 mg, 2.69 x 10<sup>-4</sup> mol), 5 mol % Cat, 1.2 equiv diethyl benzylidenemalonate (80.2 mg, 3.23 x 10<sup>-4</sup> mol), 1 equiv Base (2.69 x 10<sup>-4</sup> mol), 6 mL of degassed dichloromethane were reacted at indicated temperature. <sup>b</sup> Conversion was calculated from <sup>31</sup>P{<sup>1</sup>H} NMR. <sup>c</sup> ee was determined from <sup>31</sup>P{<sup>1</sup>H} NMR integration of the respective signals via the use of a chiral derivatizing agent. The detailed procedure is described in S5. <sup>d</sup> Solid <sup>t</sup>BuONa was used.

### 2) Screening of substrates:

**Table 2.** Substrate scope for the phosphalladacycle catalyzed P-H addition of diphenylphosphine to substituted methylidenemalonate esters.<sup>a</sup>

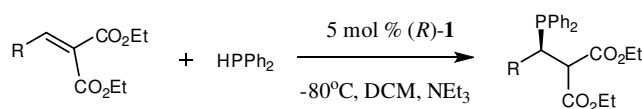

| Entry | R                                  | Conversion <sup>b</sup> (%) | ee <sup>c</sup> (%) |
|-------|------------------------------------|-----------------------------|---------------------|
| 1     | Ph                                 | 99                          | 96                  |
| 2     | OEt                                | 99                          | 74                  |
| 3     | Me                                 | 99                          | ca. 66              |
| 4     | 2 - furan                          | 99                          | 94                  |
| 5     | 4-MeOC <sub>6</sub> H <sub>4</sub> | 99                          | ca. 99              |
| 6     | ( <i>E</i> )PhCH=CH                | 99                          | >99                 |
| 7     | NH <sub>2</sub>                    | NIL                         | NIL                 |

<sup>a</sup> Conditions: HPPH<sub>2</sub> (50.0 mg, 2.69 × 10<sup>-4</sup> mol), 5 mol % Cat (*R*)-1 (8.4 mg, 1.34 × 10<sup>-5</sup> mol, 5 mol% of HPPH<sub>2</sub>), 1.2 equiv malonate ester (3.23 × 10<sup>-4</sup> mol), 1 equiv NEt<sub>3</sub> (27.1 mg, 2.69 × 10<sup>-4</sup> mol), 6 mL of degassed DCM were reacted at -80 °C. <sup>b</sup> Conversion was calculated from <sup>31</sup>P{<sup>1</sup>H} NMR. <sup>c</sup> ee was determined from <sup>31</sup>P{<sup>1</sup>H} NMR integration of the respective signals via the use of a chiral derivatizing agent. The detailed procedure is described in S5.

### 3) General procedure for synthesis of monophosphines via hydrophosphination of substituted methylenemalonate esters.

Catalyst (*R*)-1 (8.4 mg, 1.34 × 10<sup>-5</sup> mol, 5 mol % of HPPH<sub>2</sub>) was added to a degassed DCM solution (2 mL) of HPPH<sub>2</sub> (50.0 mg, 2.69 × 10<sup>-4</sup> mol). The light yellow mixture was stirred at room temperature for 10 mins and then cooled to -80 °C. Subsequently, substrate (3.22 × 10<sup>-4</sup> mol, 1.2 equivalents of HPPH<sub>2</sub>) and NEt<sub>3</sub> (27.1 mg, 2.69 × 10<sup>-4</sup> mol, 1 equivalent of HPPH<sub>2</sub>) were each dissolved in 2 mL of degassed solvent and added dropwise. The hydrophosphination reaction was monitored by <sup>31</sup>P{<sup>1</sup>H} NMR. Upon completion, the reaction mixture was warmed to room temperature and solvent evaporated by vacuum. The yellowish–orange monophosphine product was re-dissolved in degassed DCM (5 mL) and filtered through a short silica gel column (packed with degassed n – Hexane) on a two-neck Schlenk flask protected by N<sub>2</sub>. The solvent was removed by vacuum pump to give the enantio-enriched phosphine product ( $\pm$ )5.

**Determination of ee:** enantiomeric excess (ee %) were measured by <sup>31</sup>P{<sup>1</sup>H} NMR spectrum of the

corresponding compounds. The obtained phosphine product ( $\pm$ )**5** was dissolved in DCM (3 mL) and added 0.51 equiv (a little excess) of enantio-pure (*R*)-{[Pd[Me<sub>2</sub>NCH(Me)C<sub>10</sub>H<sub>6</sub>]( $\mu$ -Cl)]<sub>2</sub>} solid. After stirring for 30 min at RT, the solvent was evaporated and the <sup>31</sup>P{<sup>1</sup>H} NMR spectrum recorded. ee value was evaluated by integration of the corresponding products. The major diastereomer of **6a** was isolated by column chromatography on a silica column with hexane-dichloromethane.

The isolated **6a** (0.39 g, 0.50 mmol) was mixed with excessive sodium iodide (0.10 g, 0.60 mmol) in acetone (50 ml) and stirred vigorously for 15 min at room temperature. After the solvent were removed, the residue was extracted with dichloromethane. Removal of DCM gave **7a** as a solid, which was then recrystallized from dichloromethane-hexane to give the product as yellow needle crystals (0.40 g, 93%). Its structure was confirmed by X-ray analysis which revealed that the absolute configuration of the major product were *S*. [ $\alpha$ ]<sub>D</sub> = -316.6 (*c* 1.2, DCM). Mp: 167 °C dec. <sup>31</sup>P NMR (CDCl<sub>3</sub>, 162 M):  $\delta$  50.4; <sup>1</sup>H NMR (CDCl<sub>3</sub>, 400 M):  $\delta$  8.02-7.98 (m, 2H, Ar), 7.67 (d, 1H, *J* = 8.40 Hz, Ar), 7.51-7.48 (m, 4H, Ar), 7.38-7.35 (m, 3H, Ar), 7.28-7.26 (m, 1H, Ar), 7.20-7.15 (m, 2H, Ar), 7.06-7.00 (m, 4H, Ar), 6.90 (d, 1H, *J* = 7.60 Hz, Ar), 6.71 (d, 1H, *J* = 8.40 Hz, Ar), 6.29 (m, 1H, Ar), 5.30-5.28 (m, 1H, CH), 5.24-5.19 (m, 1H, CH), 4.34-4.28 (m, 1H, CHMe), 4.19-4.07 (m, 2H, CH<sub>2</sub>), 3.81-3.76 (m, 2H, CH<sub>2</sub>), 3.32 (d, 3H, *J* = 8.40 Hz, NMe<sub>2</sub>), 2.71 (s, 3H, NMe<sub>2</sub>), 2.13 (d, 3H, CHMe), 1.19 (t, 3H, *J* = 7.20 Hz, CH<sub>2</sub>CH<sub>3</sub>), 0.88 (t, 3H, *J* = 7.20 Hz, CH<sub>2</sub>CH<sub>3</sub>); <sup>13</sup>C NMR (CDCl<sub>3</sub>, 100 M):  $\delta$  168.0 (d, 1C, *J* = 67.30 Hz, COOEt), 167.5 (d, 1C, *J* = 88.40 Hz, COOEt), 155.6 (d, 1C, *J* = 5.06 Hz, Ar), 147.8-123.3 (27 C, Ar), 73.3 (1C, CHMe), 61.8 (1C, CH<sub>2</sub>CH<sub>3</sub>), 61.2 (1C, CH<sub>2</sub>CH<sub>3</sub>), 56.6 (d, 1C, *J*<sub>PC</sub> = 8.66 Hz, CH), 52.1 (1C, NMe), 51.3 (1C, NMe), 49.3 (d, 1C, *J*<sub>PC</sub> = 24.81 Hz, CH), 22.7 (1C, CHMe), 13.9 (1C, CH<sub>2</sub>CH<sub>3</sub>), 13.5 (1C, CH<sub>2</sub>CH<sub>3</sub>).

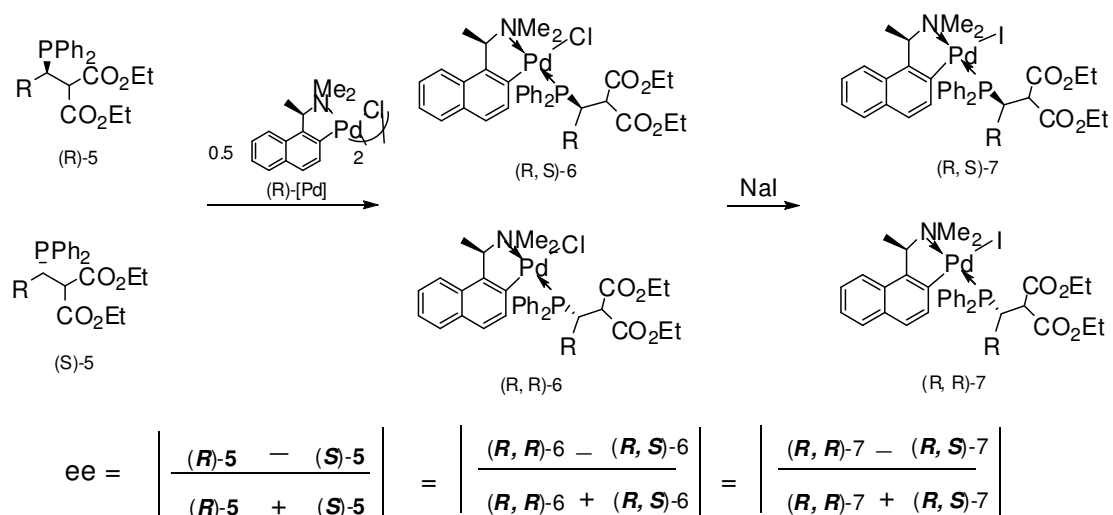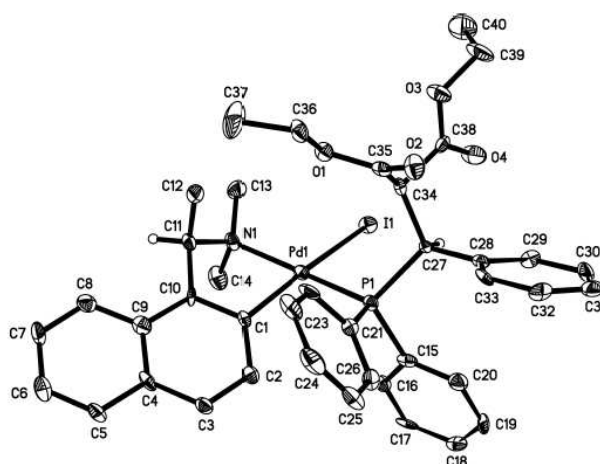

Figure 2.

#### 4) Characterization Data

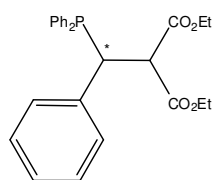

Table 2, Entry 1:

(±)5a

Compound 4a was reacted with HPPH<sub>2</sub> at -80 °C for 3.5 h according to the general procedure to provide (±)5a (99% conversion, 96% ee) (air sensitive): [α]<sub>D</sub> = -82.8 (c 1.3, DCM). <sup>31</sup>P NMR (CDCl<sub>3</sub>, 121 M): δ 2.7; <sup>1</sup>H NMR (CDCl<sub>3</sub>, 400 M): δ 7.64-7.59 (m, 2H, Ar), 7.35-7.31 (m, 3H, Ar),

7.23-7.11 (m, 5H, Ar), 7.05-7.03 (m, 3H, Ar), 6.99-6.96 (m, 2H, Ar), 4.40 (dd, 1H,  $J = 10.76, 3.42$  Hz,  $\text{CH}(\text{COOEt})_2$ ), 3.94 (dd, 1H,  $J = 10.76, 7.10$  Hz,  $\text{Ph}_2\text{PCH}$ ), 3.91-3.84 (m, 3H,  $\text{COOCH}_2\text{CH}_3$ ), 3.78-3.70 (m, 1H,  $\text{COOCH}_2\text{CH}_3$ ), 1.15 (t, 3H,  $J = 7.24$  Hz,  $\text{CH}_2\text{CH}_3$ ), 0.92 (t, 3H,  $J = 7.24$  Hz,  $\text{CH}_2\text{CH}_3$ );  $^{13}\text{C}$  NMR ( $\text{CDCl}_3$ , 75 M):  $\delta$  167.9 (1C, COOEt), 167.5 (1C, COOEt), 134.7-126.5 (18 C, Ar), 61.5 (1C,  $\text{CH}_2\text{CH}_3$ ), 61.3 (1C,  $\text{CH}_2\text{CH}_3$ ), 56.2 (d, 1C,  $J_{\text{PC}} = 27.03$  Hz,  $\text{PPh}_2\text{CH}$ ), 44.2 (d, 1C,  $J_{\text{PC}} = 19.57$  Hz,  $\text{CH}(\text{OEt})_2$ ), 13.8 (1C,  $\text{CH}_2\text{CH}_3$ ), 13.7 (1C,  $\text{CH}_2\text{CH}_3$ ).

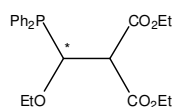

**Table 2, Entry 2:** ( $\pm$ )**5b**

Compound **5b** was reacted with  $\text{HPPH}_2$  at  $-80^\circ\text{C}$  for 8h according to the general procedure to provide ( $\pm$ )**5b** (99% conversion, 74% ee) (airsensitive):  $[\alpha]_{\text{D}} = -90.7$  ( $c$  0.4, DCM).  $^{31}\text{P}$  NMR ( $\text{CDCl}_3$ , 121 M):  $\delta$  -2.6;  $^1\text{H}$  NMR ( $\text{CDCl}_3$ , 300 M):  $\delta$  7.83-7.78 (m, 2H, Ar), 7.52-7.48 (m, 2H, Ar), 7.43-7.41 (m, 3H, Ar), 7.34-7.32 (m, 3H, Ar), 4.87 (dd, 1H,  $J = 9.6, 6.9$  Hz,  $\text{PPh}_2\text{CH}$ ), 4.19 (q, 2H,  $J = 6.9$  Hz,  $\text{COOCH}_2\text{CH}_3$ ), 4.10 (qd, 2H,  $J = 7.2, 2.1$  Hz,  $\text{COOCH}_2\text{CH}_3$ ), 3.66 (dd, 1H,  $J = 9.9, 6.6$  Hz,  $\text{CH}(\text{COOEt})_2$ ), 3.47 (m, 1H,  $\text{OCH}_2\text{CH}_3$ ), 3.03 (m, 1H,  $\text{OCH}_2\text{CH}_3$ ), 1.30-1.21 (m, 6H,  $\text{COOCH}_2\text{CH}_3$ ), 0.90 (t, 3H,  $\text{OCH}_2\text{CH}_3$ );  $^{13}\text{C}$  NMR ( $\text{CDCl}_3$ , 75 M):  $\delta$  167.5 (1C,  $\text{COOCH}_2\text{CH}_3$ ), 167.0 (1C,  $\text{COOCH}_2\text{CH}_3$ ), 135.6-128.2 (12C, Ar), 80.4 (d, 1C,  $J_{\text{PC}} = 20.3$  Hz,  $\text{PPh}_2\text{CH}$ ), 69.3 (1C,  $\text{OCH}_2\text{CH}_3$ ), 61.5 (2C,  $\text{COOCH}_2\text{CH}_3$ ), 56.9 (d, 1C,  $J_{\text{PC}} = 22.5$  Hz,  $\text{CH}(\text{OEt})_2$ ), 15.1 (1C,  $\text{OCH}_2\text{CH}_3$ ), 14.0 (1C,  $\text{COOCH}_2\text{CH}_3$ ), 13.9 (1C,  $\text{COOCH}_2\text{CH}_3$ ).

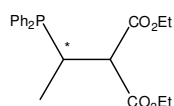

**Table 2, Entry 3:** ( $\pm$ )**5c**

Compound **4c** was reacted with  $\text{HPPH}_2$  at  $-80^\circ\text{C}$  for 4h according to the general procedure to provide ( $\pm$ )**5c** (99% conversion, 66% ee) (airsensitive):  $[\alpha]_{\text{D}} = -50.2$  ( $c$  0.3, DCM).  $^{31}\text{P}$  NMR ( $\text{CDCl}_3$ , 202 M):  $\delta$  -3.8;  $^1\text{H}$  NMR ( $\text{CDCl}_3$ , 500 M):  $\delta$  7.55-7.49 (m, 4H, Ar), 7.37-7.32 (m, 6H, Ar), 4.20 (qd, 2H,  $J = 7.4, 1.0$  Hz,  $\text{COOCH}_2\text{CH}_3$ ), 4.14-4.06 (m, 2H,  $\text{COOCH}_2\text{CH}_3$ ), 3.32 (t, 1H,  $J = 7.0$  Hz,  $\text{CH}(\text{OEt})_2$ ), 3.20-3.14 (m, 1H,  $\text{PPh}_2\text{CH}$ ), 1.27 (t, 3H,  $J = 7.2$  Hz,  $\text{COOCH}_2\text{CH}_3$ ), 1.24 (t, 3H,  $J = 7.2$  Hz,  $\text{COOCH}_2\text{CH}_3$ ), 1.10 (q, 3H,  $J = 7.0$  Hz,  $\text{PPh}_2\text{CHCH}_3$ );  $^{13}\text{C}$  NMR ( $\text{CDCl}_3$ , 125 M):  $\delta$  168.7 (d, 1C,  $J_{\text{PC}} = 7.4$  Hz, COOEt), 168.2 (d, 1C,  $J_{\text{PC}} = 9.1$  Hz, COOEt), 134.4-128.4 (m, 12C,

Ar), 61.5 (1C, CH<sub>2</sub>CH<sub>3</sub>), 61.3 (1C, CH<sub>2</sub>CH<sub>3</sub>), 54.5 (d, 1C,  $J_{\text{PC}} = 21.1$  Hz, CH(COOEt)<sub>2</sub>), 30.5 (d, 1C,  $J_{\text{PC}} = 14.8$  Hz, PPh<sub>2</sub>CH), 14.1 (1C, CH<sub>3</sub>), 14.0 (1C, CH<sub>3</sub>), 13.9 (1C, CH<sub>3</sub>).

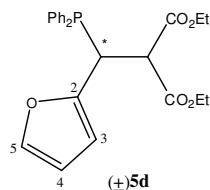

**Table 2, Entry 4:**

Compound 4d was reacted with HPPH<sub>2</sub> at -80 °C for 4h according to the general procedure to provide (±)5d (99% conversion, 94% ee) (airsensitive):  $[\alpha]_{\text{D}} = -120.7$  (*c* 0.6, DCM). <sup>31</sup>P NMR (CDCl<sub>3</sub>, 202 M):  $\delta$  1.5; <sup>1</sup>H NMR (CDCl<sub>3</sub>, 500 M):  $\delta$  7.57-7.54 (m, 2H, Ar), 7.38-7.32 (m, 3H, Ar), 7.32-7.28 (m, 1H, Ar), 7.23-7.16 (m, 4H, Ar), 7.07 (d, 1H,  $J = 1.0$  Hz, C<sub>5</sub>H), 6.08 (q, 1H, C<sub>4</sub>H), 5.76 (d, 1H,  $J = 3.2$  Hz C<sub>3</sub>H), 4.51 (d, 1H,  $J = 10.6$  Hz, CH(OEt)<sub>2</sub>), 4.09-4.02 (m, 4H, COOCH<sub>2</sub>CH<sub>3</sub>), 3.80 (dd, 1H,  $J = 10.6, 6.3$  Hz, PPh<sub>2</sub>CH), 1.24 (t, 3H,  $J = 7.3$  Hz, COOCH<sub>2</sub>CH<sub>3</sub>), 1.08 (t, 3H,  $J = 7.5$  Hz, COOCH<sub>2</sub>CH<sub>3</sub>); <sup>13</sup>C NMR (CDCl<sub>3</sub>, 125 M):  $\delta$  167.7 (1C, COOEt), 167.4 (1C, COOEt), 151.2 (1C, C<sub>2</sub>), 140.8 (1C, C<sub>5</sub>), 134.6-128.0 (m, 12C, Ar), 110.3 (1C, C<sub>4</sub>), 107.4 (d, 1C,  $J = 2.5$  Hz, C<sub>3</sub>), 61.8 (1C, CH<sub>2</sub>CH<sub>3</sub>), 61.5 (1C, CH<sub>2</sub>CH<sub>3</sub>), 54.5 (d, 1C,  $J_{\text{PC}} = 27.5$  Hz, PPh<sub>2</sub>CH), 38.3 (d, 1C,  $J_{\text{PC}} = 22.0$  Hz, CH(COOEt)<sub>2</sub>), 14.0 (1C, COOCH<sub>2</sub>CH<sub>3</sub>), 13.9 (1C, COOCH<sub>2</sub>CH<sub>3</sub>).

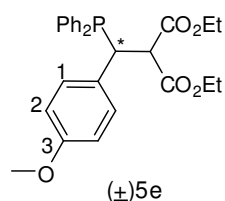

**Table 2, Entry 5:**

Compound 4e was reacted with HPPH<sub>2</sub> at -80 °C for 8h according to the general procedure to provide (±)5e (99% conversion, >99% ee) (airsensitive):  $[\alpha]_{\text{D}} = -92.9$  (*c* 0.7, DCM). <sup>31</sup>P NMR (CDCl<sub>3</sub>, 202 M):  $\delta$  1.2; <sup>1</sup>H NMR (CDCl<sub>3</sub>, 500 M):  $\delta$  7.61-7.58 (m, 2H, Ar), 7.34-7.31 (m, 3H, Ar), 7.20-7.15 (m, 5H, Ar), 6.92 (d, 2H,  $J = 8.5$  Hz, C<sub>1</sub>H), 6.61 (d, 2H,  $J = 8.5$  Hz, C<sub>2</sub>H), 4.29 (q, 1H, CH(OEt)<sub>2</sub>), 3.89-3.85 (m, 4H, COOCH<sub>2</sub>CH<sub>3</sub>), 3.76-3.71 (m, 1H, PPh<sub>2</sub>CH), 1.24 (t, 3H,  $J = 7.3$  Hz, COOCH<sub>2</sub>CH<sub>3</sub>), 1.08 (t, 3H,  $J = 7.5$  Hz, COOCH<sub>2</sub>CH<sub>3</sub>); <sup>13</sup>C NMR (CDCl<sub>3</sub>, 125 M):  $\delta$  168.0 (1C, COOEt), 167.5 (1C, COOEt), 158.0 (1C, C<sub>3</sub>), 134.6-128.0 (m, 15C, Ar), 113.2 (2C, C<sub>2</sub>), 61.6 (1C, CH<sub>2</sub>CH<sub>3</sub>), 61.3 (1C, CH<sub>2</sub>CH<sub>3</sub>), 56.3 (d, 1C,  $J_{\text{PC}} = 26.9$  Hz, PPh<sub>2</sub>CH), 55.1 (1C, OCH<sub>3</sub>), 43.3 (d, 1C,  $J_{\text{PC}} = 19.0$  Hz, CH(COOEt)<sub>2</sub>), 13.9 (1C, COOCH<sub>2</sub>CH<sub>3</sub>), 13.8 (1C, COOCH<sub>2</sub>CH<sub>3</sub>).

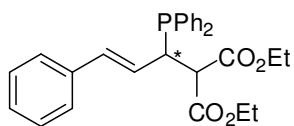

**Table 2, Entry 6:** (±)**5f**

Compound **4f** was reacted with HPPH<sub>2</sub> at -80 °C for 4h according to the general procedure to provide (±)**5f** (99% conversion, >99% ee) (airsensitive): [ $\alpha$ ]<sub>D</sub> = -160.9 (*c* 1.7, DCM). <sup>31</sup>P NMR (CDCl<sub>3</sub>, 121 M):  $\delta$  0.2; <sup>1</sup>H NMR (CDCl<sub>3</sub>, 300 M):  $\delta$  7.60-7.51 (m, 4H, Ar), 7.40-7.32 (m, 6H, Ar), 7.28-7.12 (m, 5H, Ar), 6.23 (d, 1H, *J* = 8.5 Hz, PhCH), 6.02-5.92 (m, 1H, PhCH=CH), 4.24-4.10 (m, 4H, COOCH<sub>2</sub>CH<sub>3</sub>), 3.91 (t, 1H, *J* = 9.7 Hz, CH(OEt)<sub>2</sub>), 3.61-3.55 (dd, 1H, *J* = 6.7, 2.9 Hz, PPh<sub>2</sub>CH), 1.30 (t, 3H, *J* = 7.1 Hz, COOCH<sub>2</sub>CH<sub>3</sub>), 1.18 (t, 3H, *J* = 7.1 Hz, COOCH<sub>2</sub>CH<sub>3</sub>); <sup>13</sup>C NMR (CDCl<sub>3</sub>, 75 M):  $\delta$  168.0 (d, 1C, *J* = 4.2 Hz, COOEt), 167.7 (d, 1C, *J* = 13.2 Hz, COOEt), 137.0-1226.1 (m, 20C, Ar, CH=CH), 61.7 (1C, CH<sub>2</sub>CH<sub>3</sub>), 61.4 (1C, CH<sub>2</sub>CH<sub>3</sub>), 54.5 (d, 1C, *J*<sub>PC</sub> = 24.9 Hz, PPh<sub>2</sub>CH), 42.0 (d, 1C, *J*<sub>PC</sub> = 19.3 Hz, CH(COOEt)<sub>2</sub>), 14.1 (2C, CH<sub>3</sub>).

## **References:**

1. (a) Ng, J. K.-P.; Tan, G.-K.; Vittal, J. J.; Leung, P.-H. *Inorg. Chem.* **2003**, *42*, 7674-7682. (b) Ng, J. K.-P.; Li, Y.; Tan, G.-K.; Koh, L.-L.; Vittal, J. J.; Leung, P.-H. *Inorg. Chem.* **2005**, *44*, 9874-9886. (c) Allen, D. G.; McLaughlin, G. M.; Robertson, G. B.; Steffen, W. L.; Salem, G.; Wild, S. B. *Inorg. Chem.* **1982**, *21*, 1007-1014.
2. (a) Huang, Y.; Chew, R. J.; Li, Y.; Pullarkat, S. A.; Leung, P. H. *Org. Lett.* **2011**, *13*, 5862-5865. (b) Chooi, S. Y. M.; Leung, P. H.; Lim, C. C.; Mok, K. F.; Quek, G. H.; Sim, K. Y.; Tan, M. K. *Tetrahedron: Asymmetry* **1992**, *3*, 529-532.

## NMR Spectra

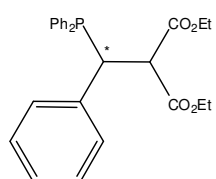

Table 2, Entry 1:

(±)5a

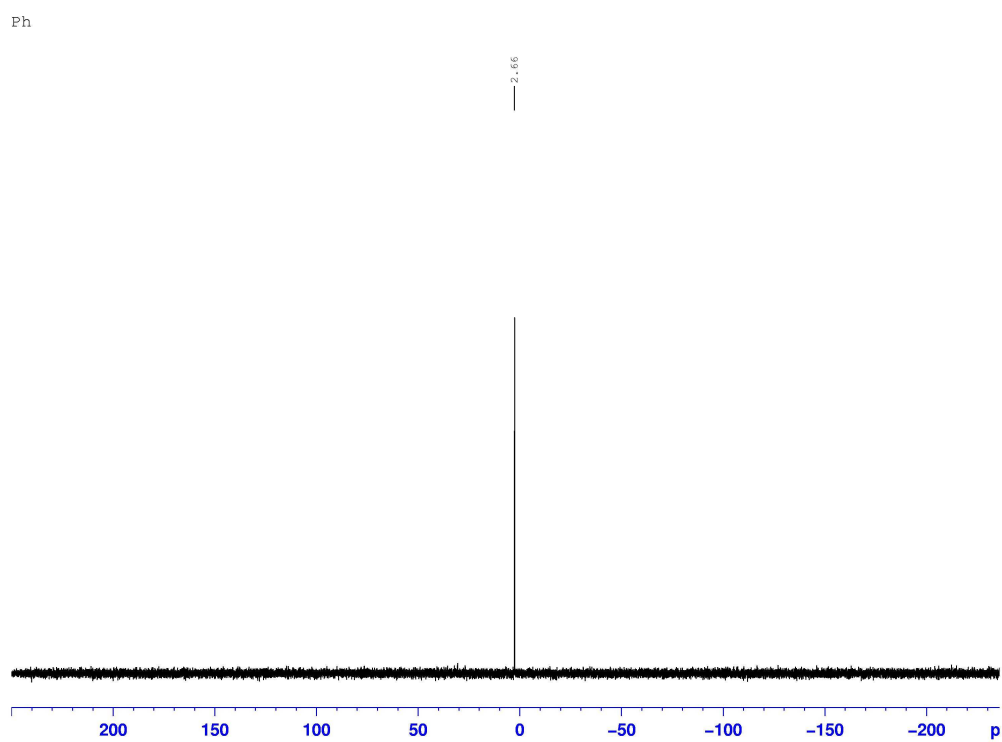

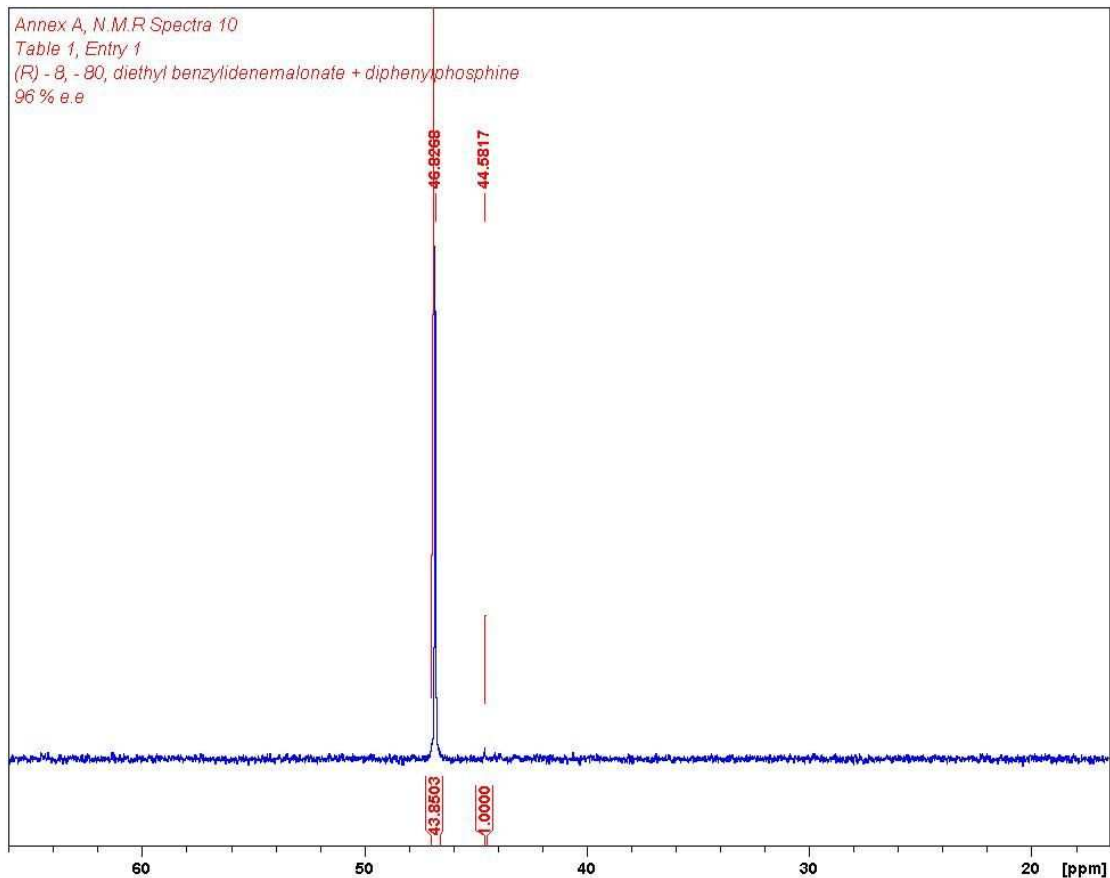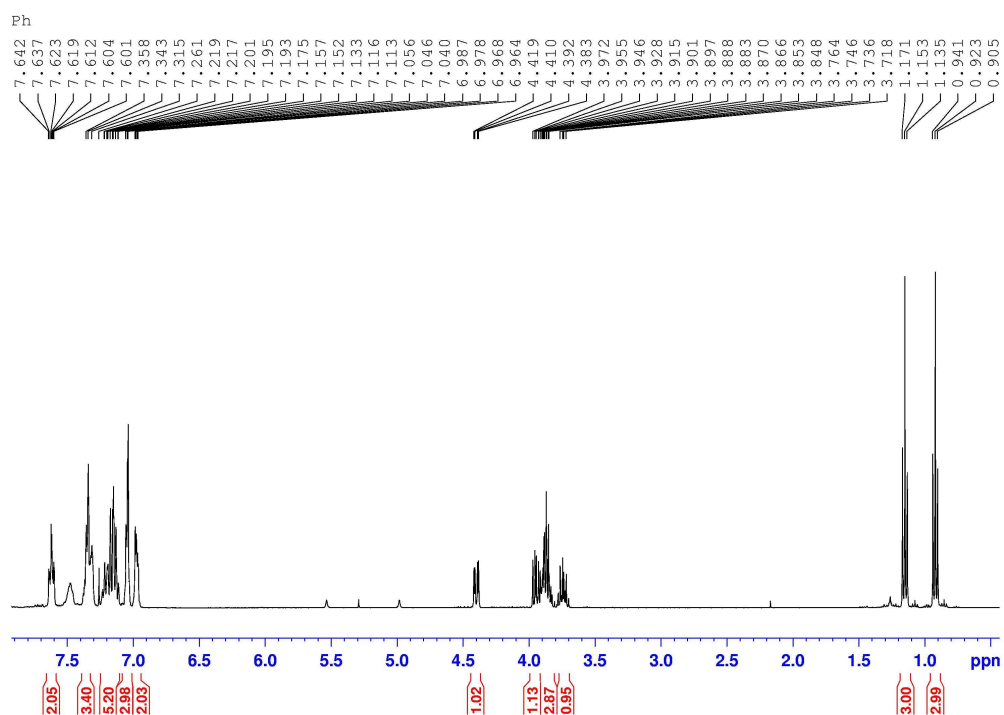

Ph

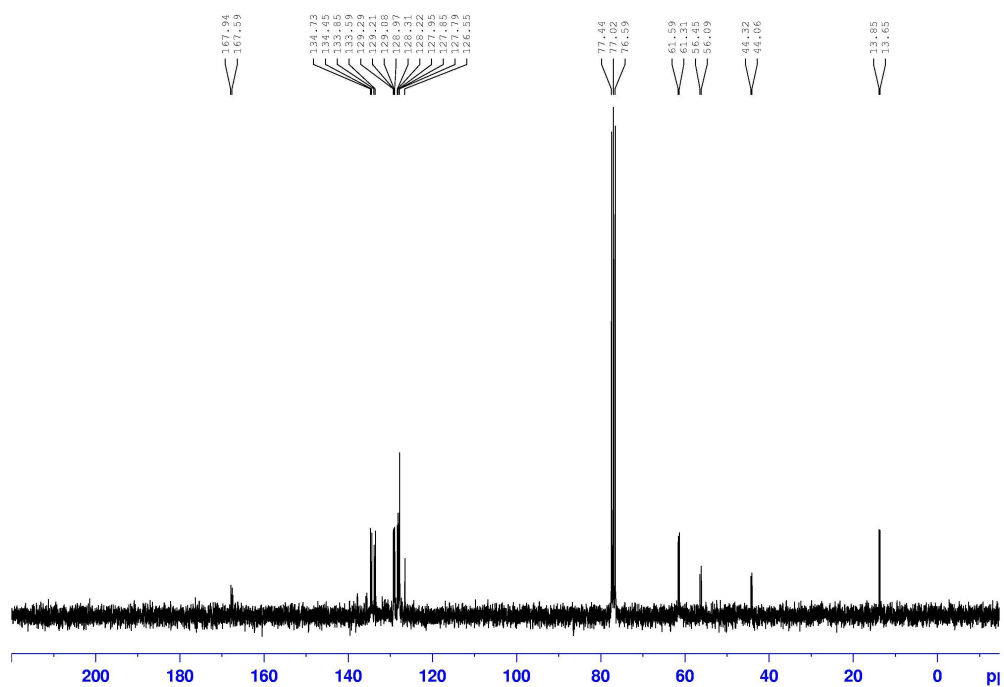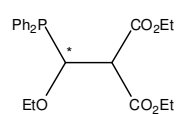

Table 2, Entry 2:

(±)5b

OBt

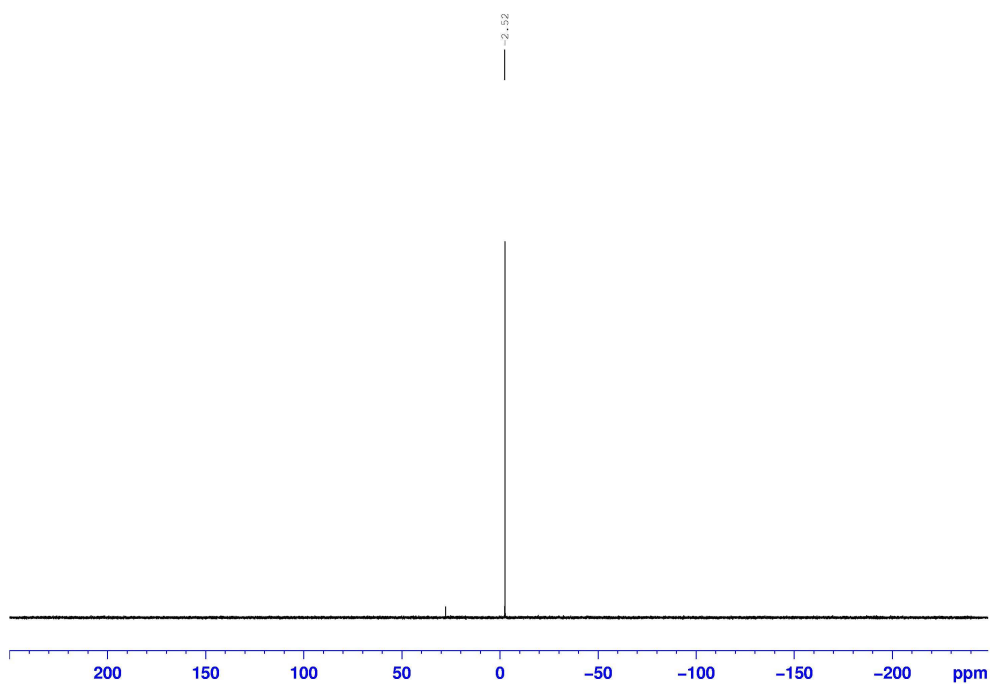

Annex A, N.M.R Spectra 23

Table 2, Entry 2

(R) - 8, - 80, diethyl ethoxymethylenemalonate + diphenylphosphine

74 % e.e

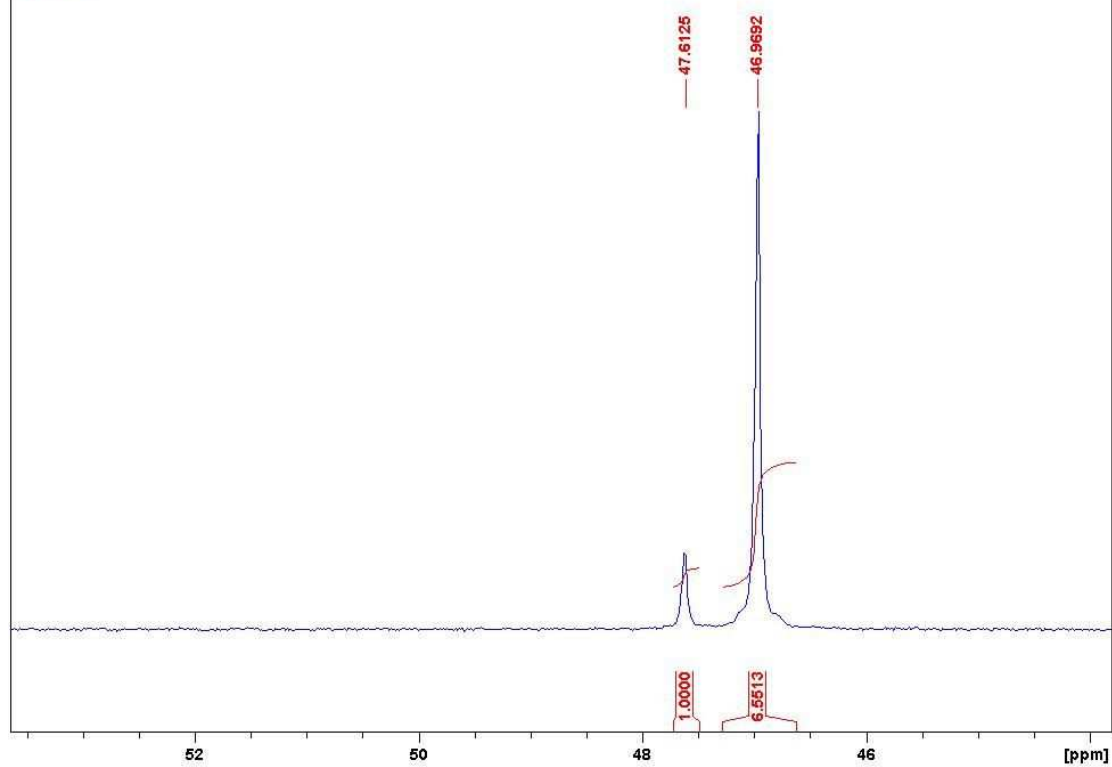

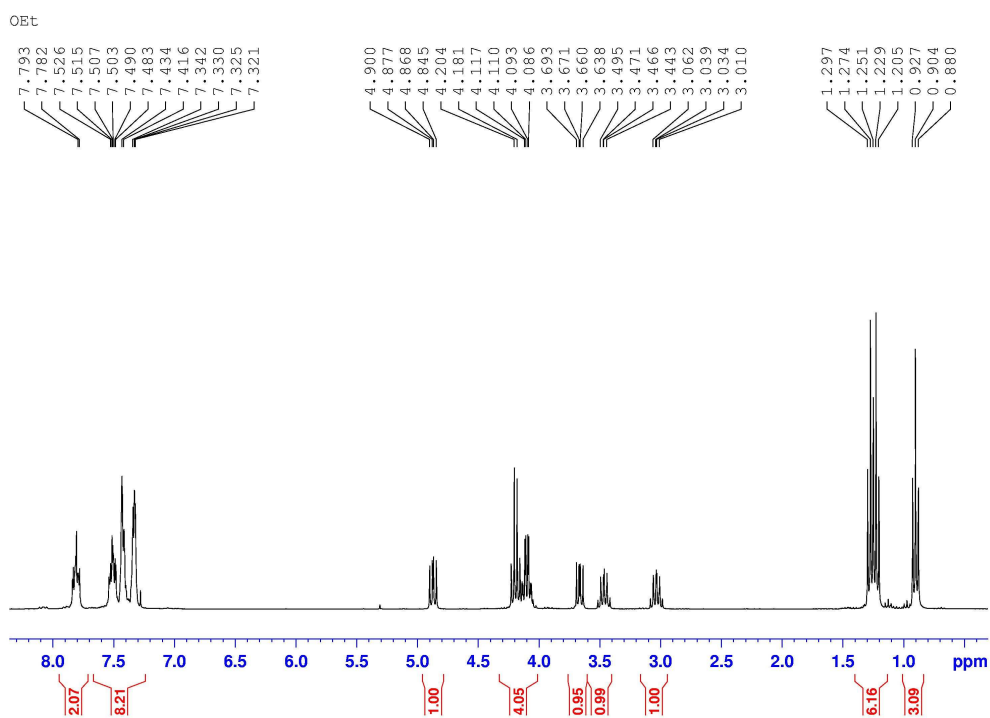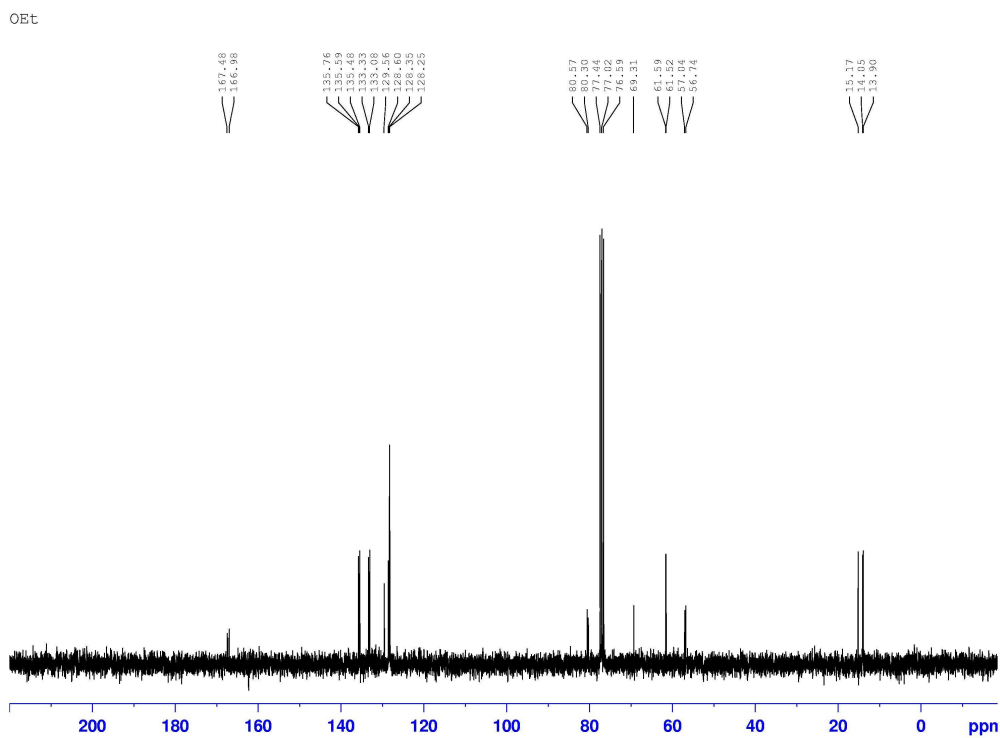

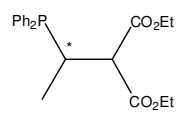

**Table 2, Entry 3:**

(±)<sup>5</sup>C

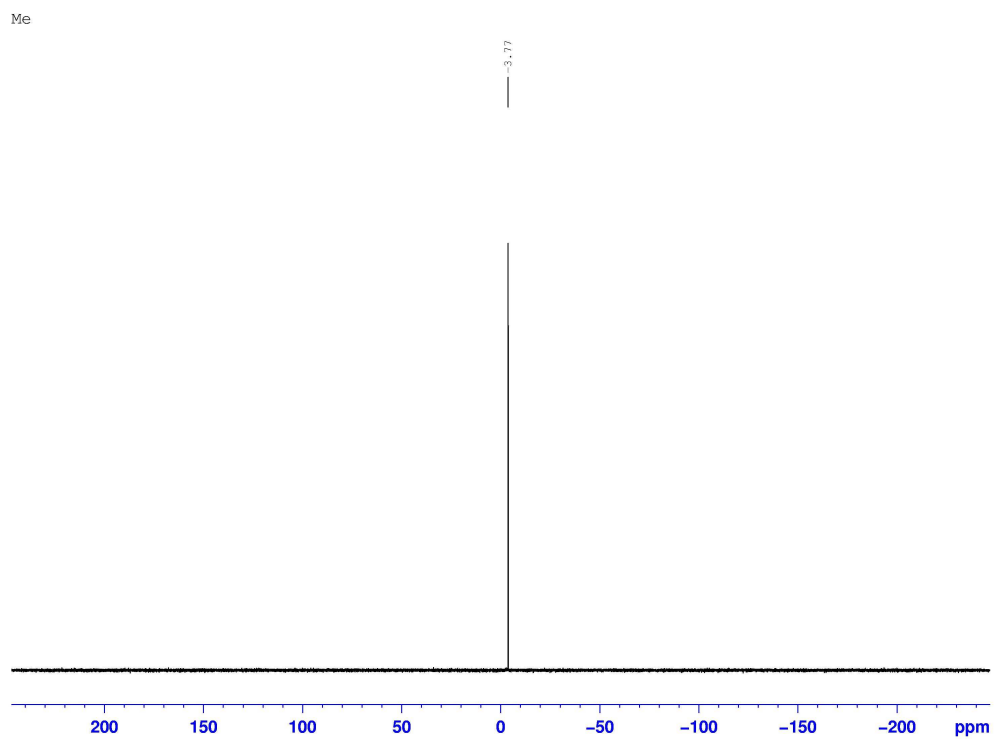

Annex A, NMR Spectra 24

Table 2, Entry 3

(R)-8, -80, diethyl ethylenemalonate + diphenylphosphine

66 % e.e

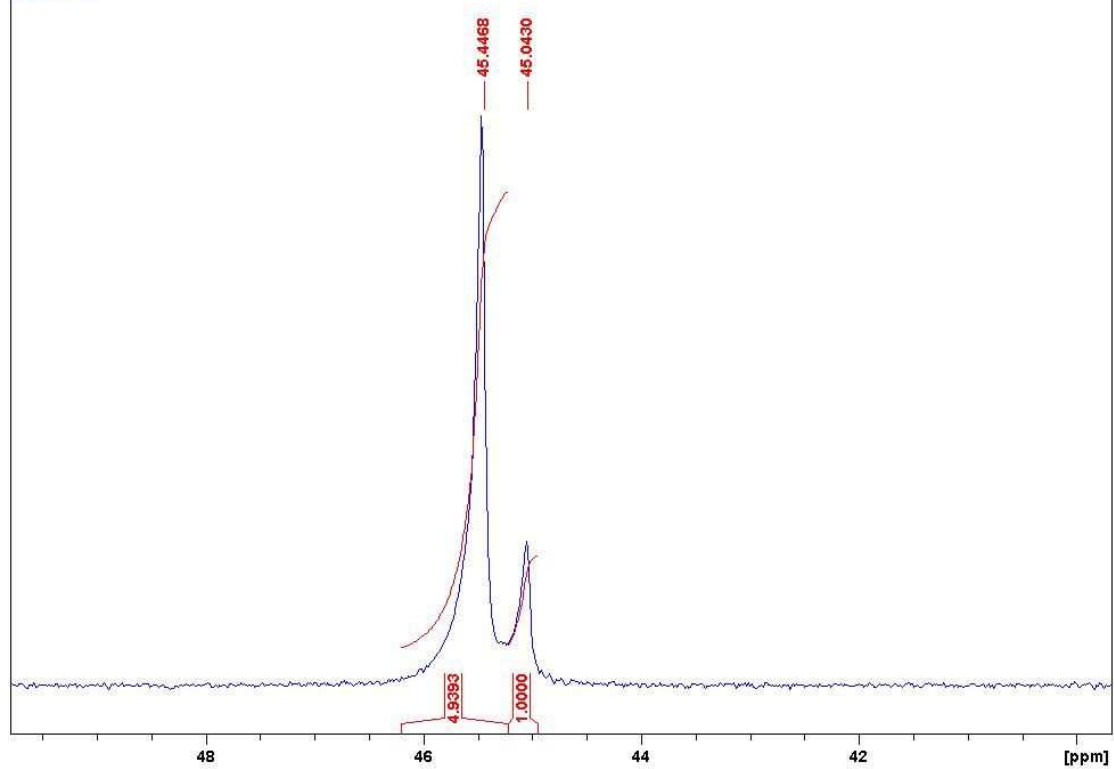

Me

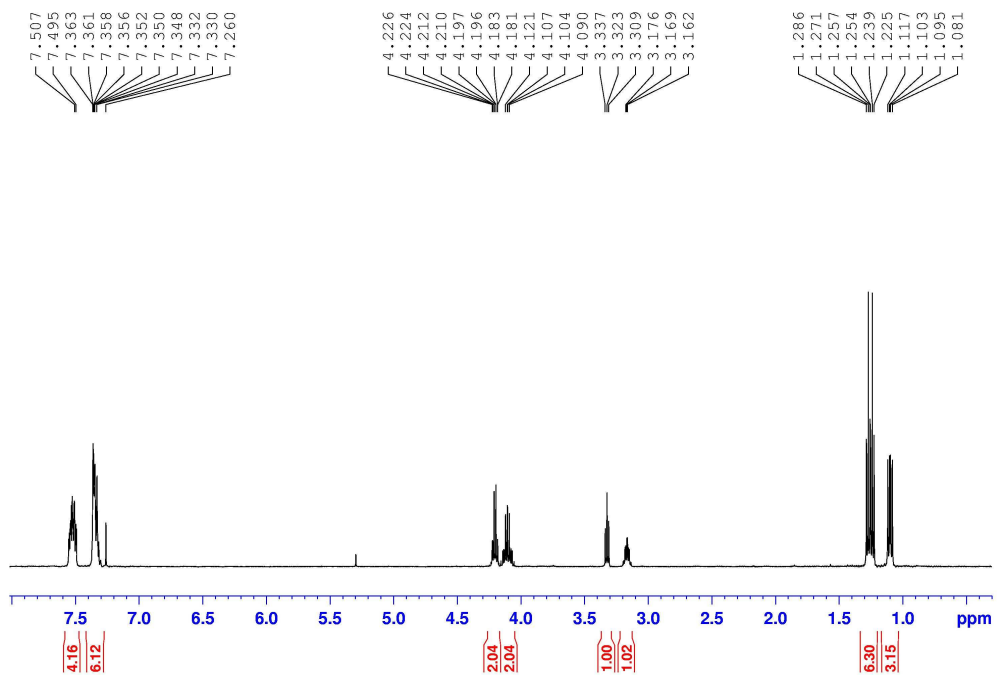

Me

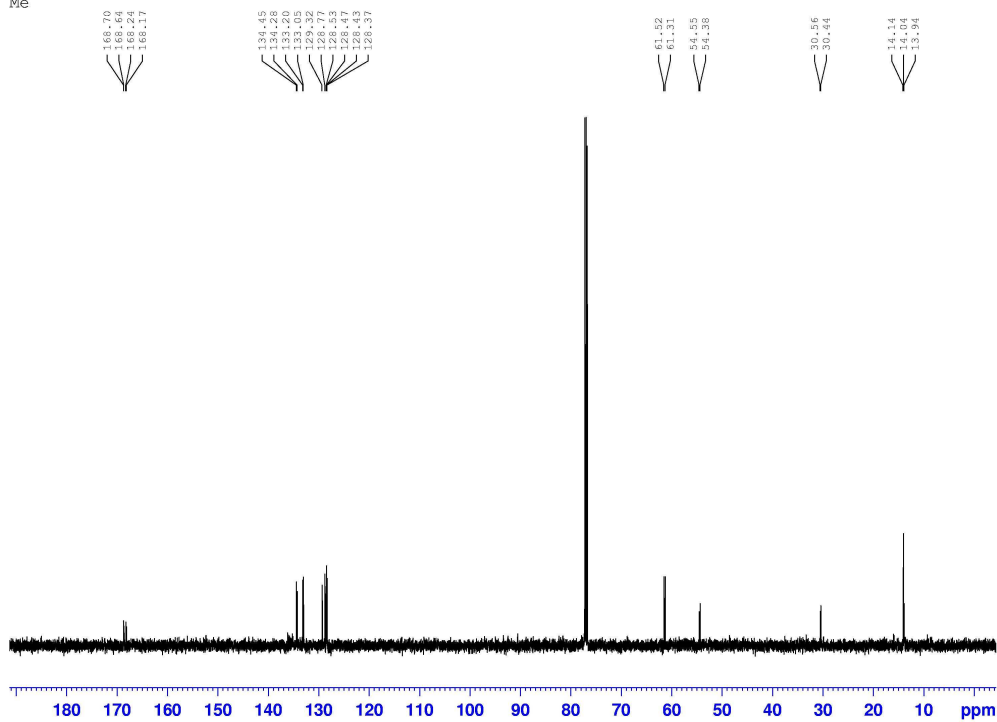

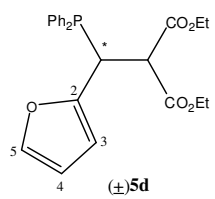

**Table 2, Entry 4:**

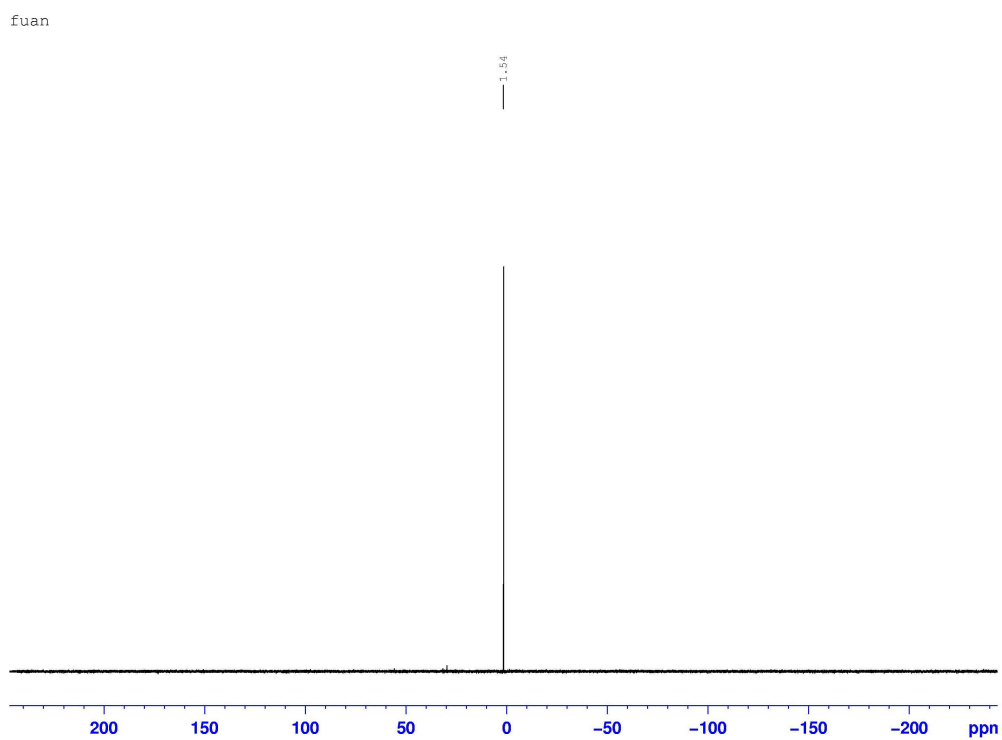

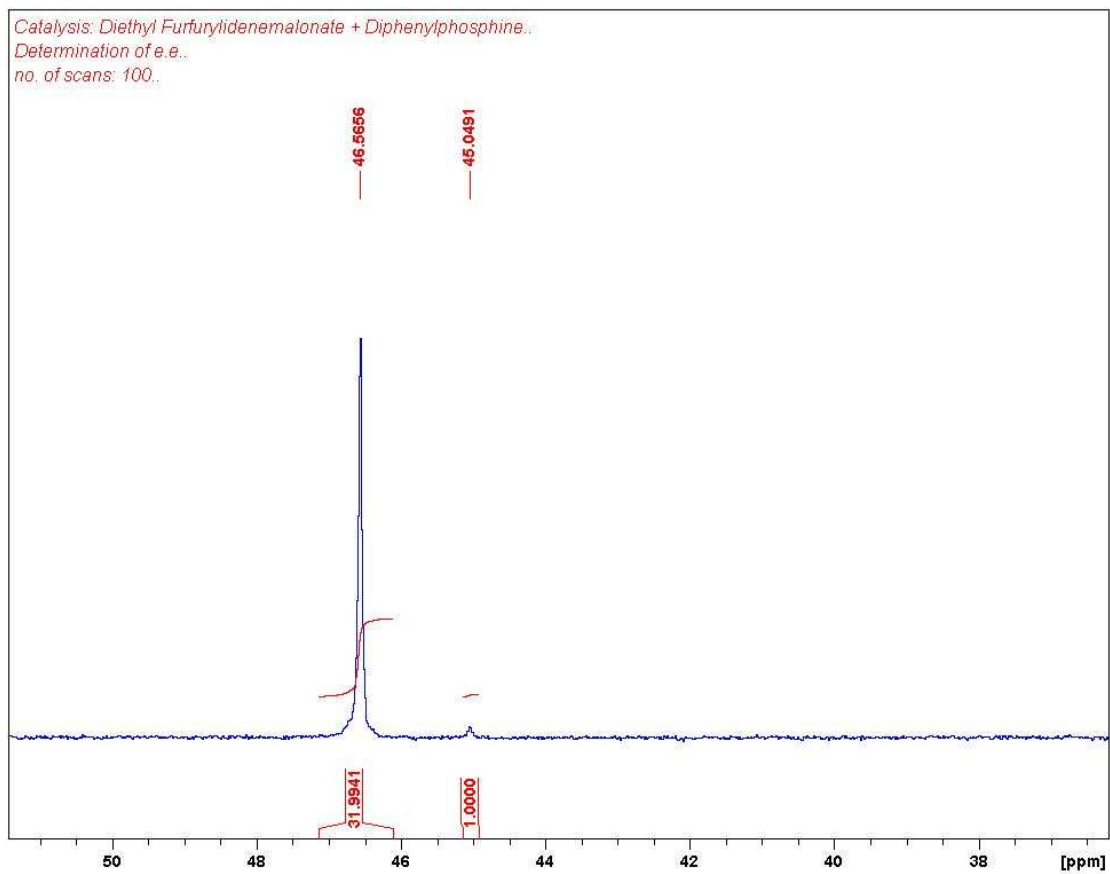

furan

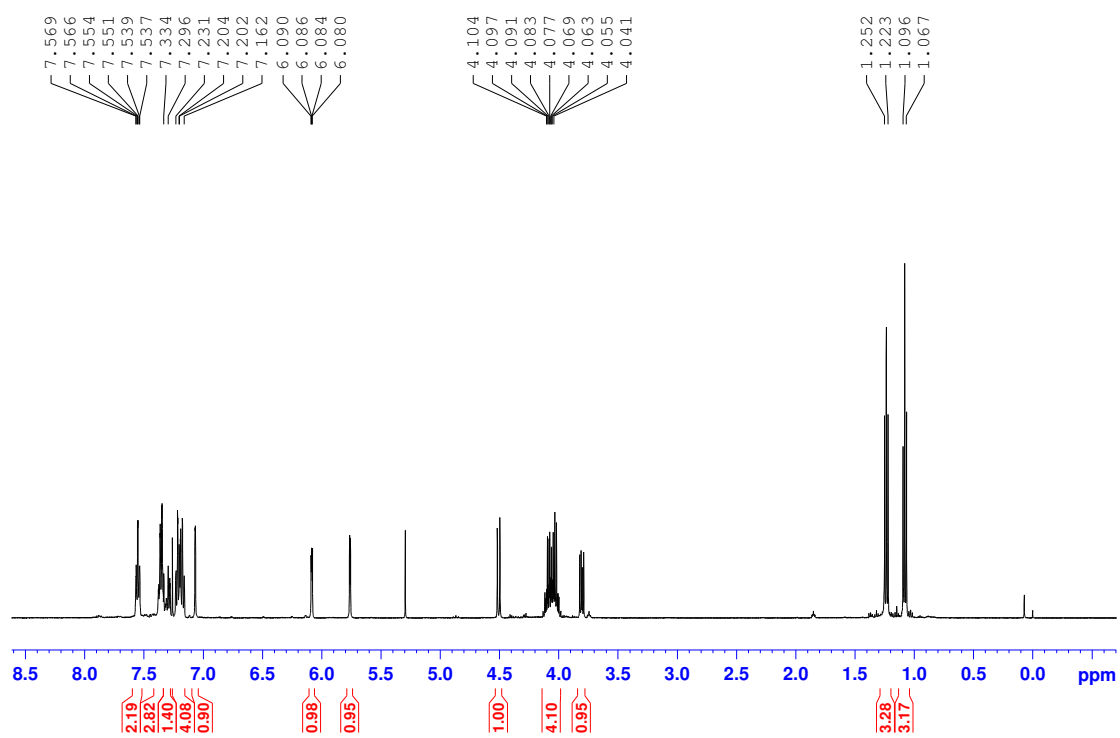

furan

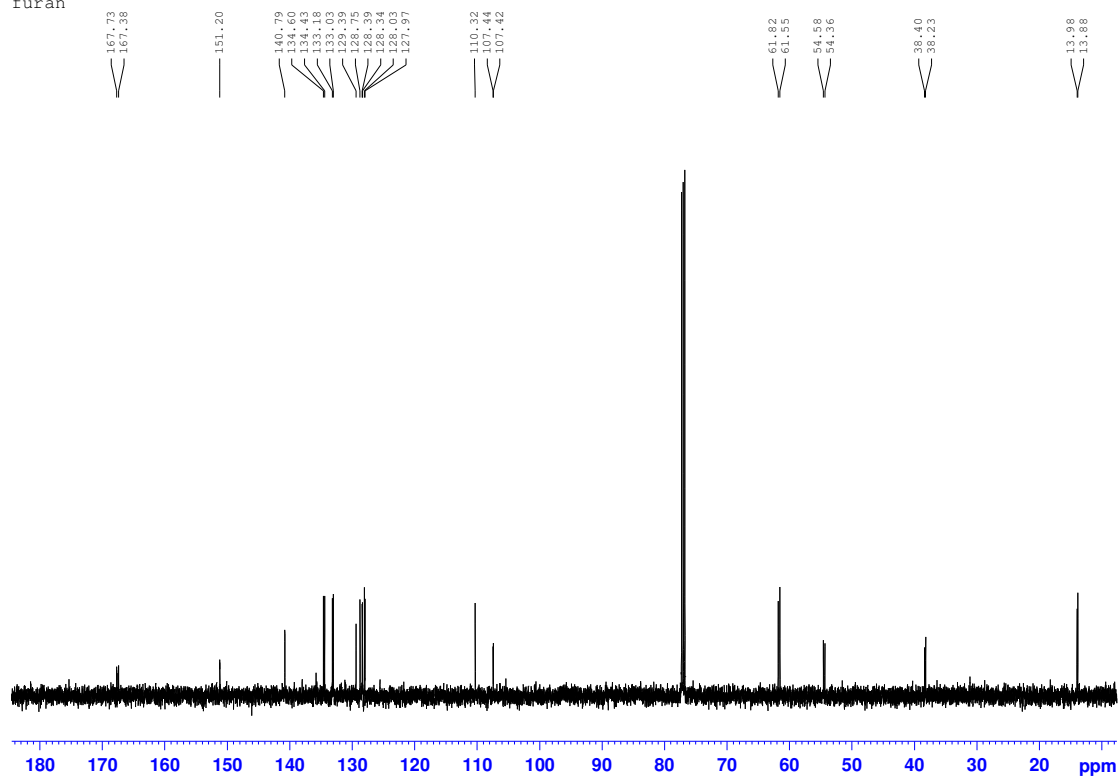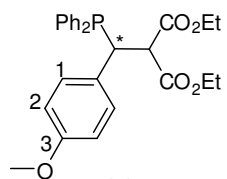

Table 2, Entry 5:

P-OMe-Ph

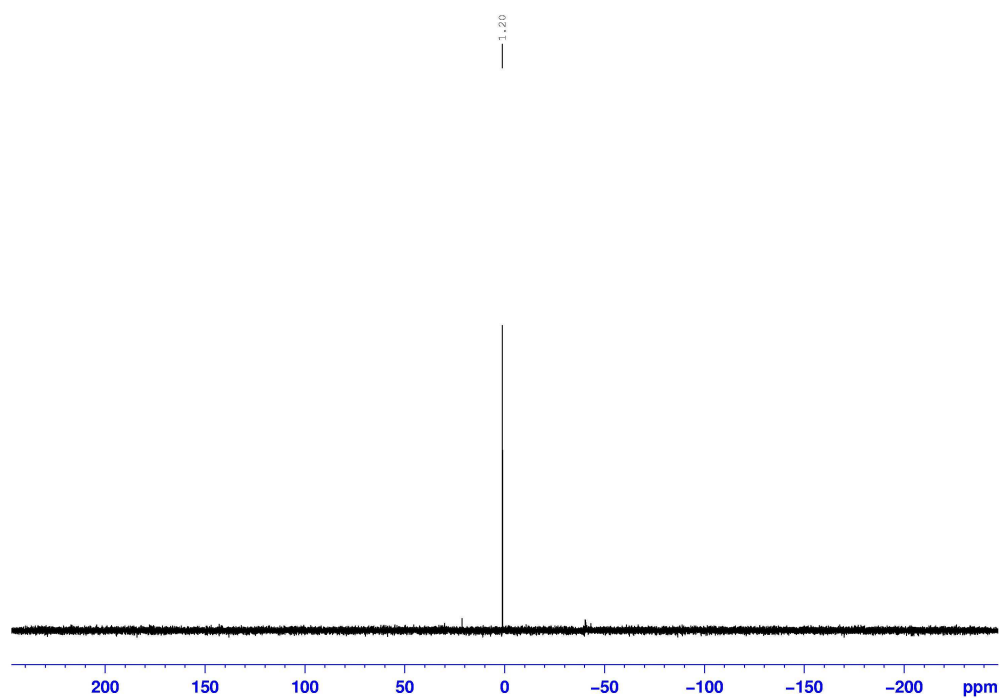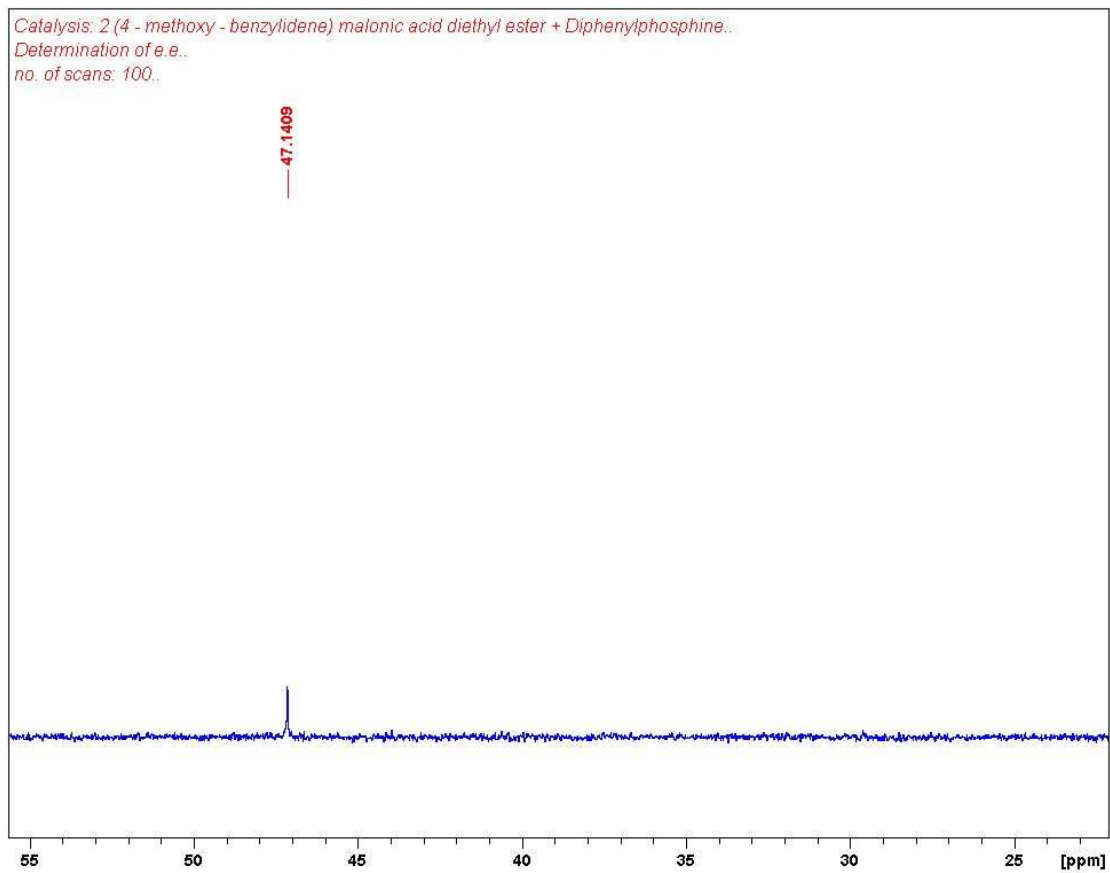

p-OMe-Ph

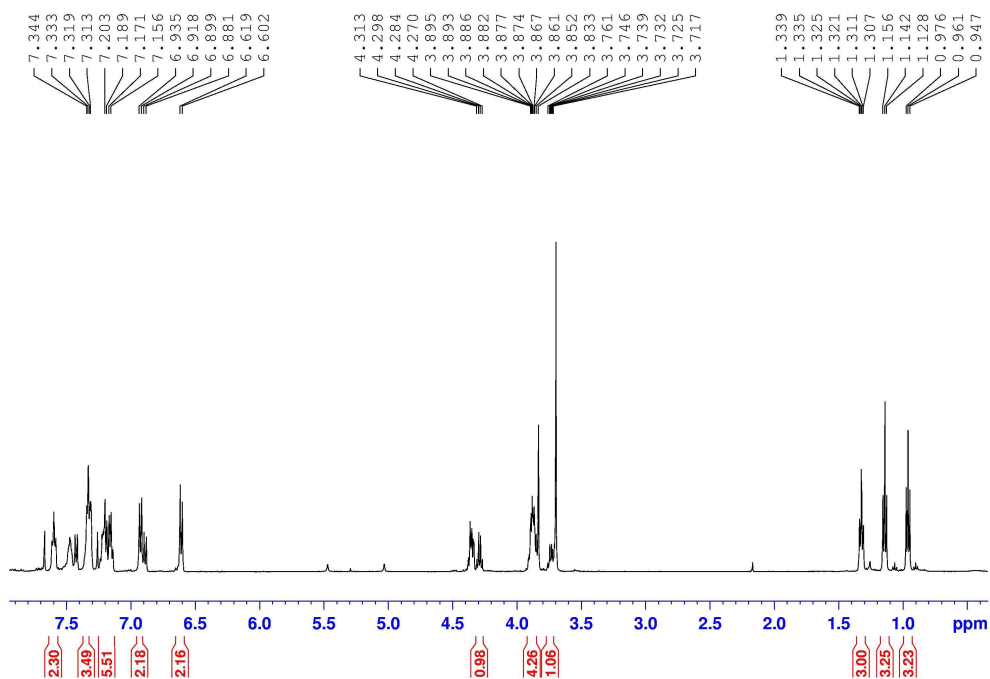

p-PMe-Ph

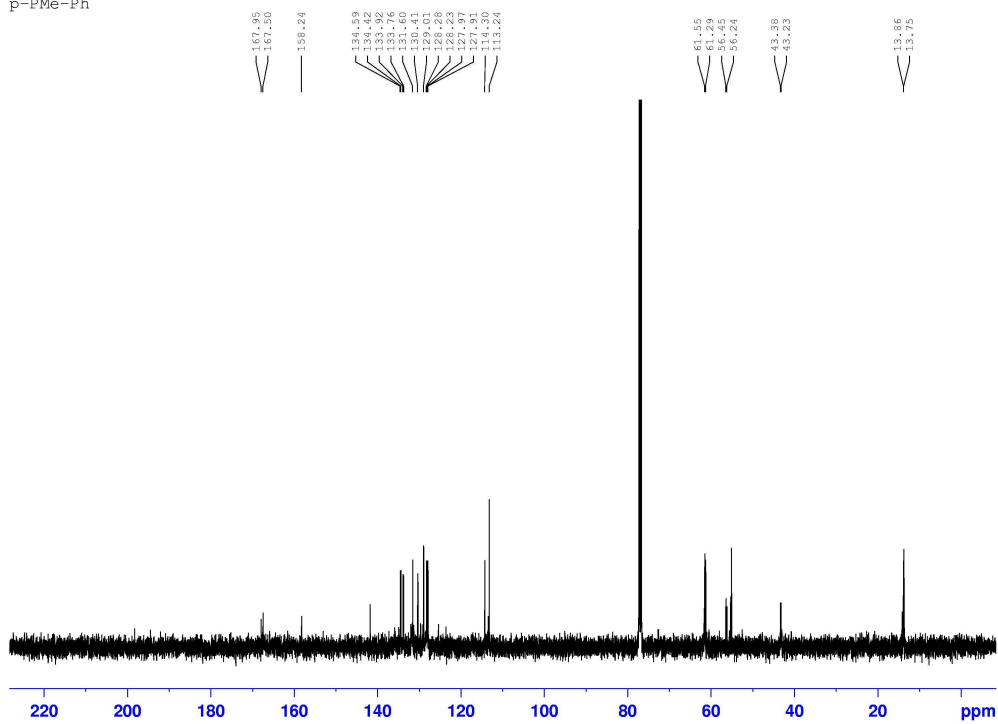

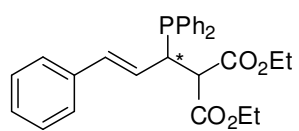

**Table 2, Entry 6:** **(±)5f**

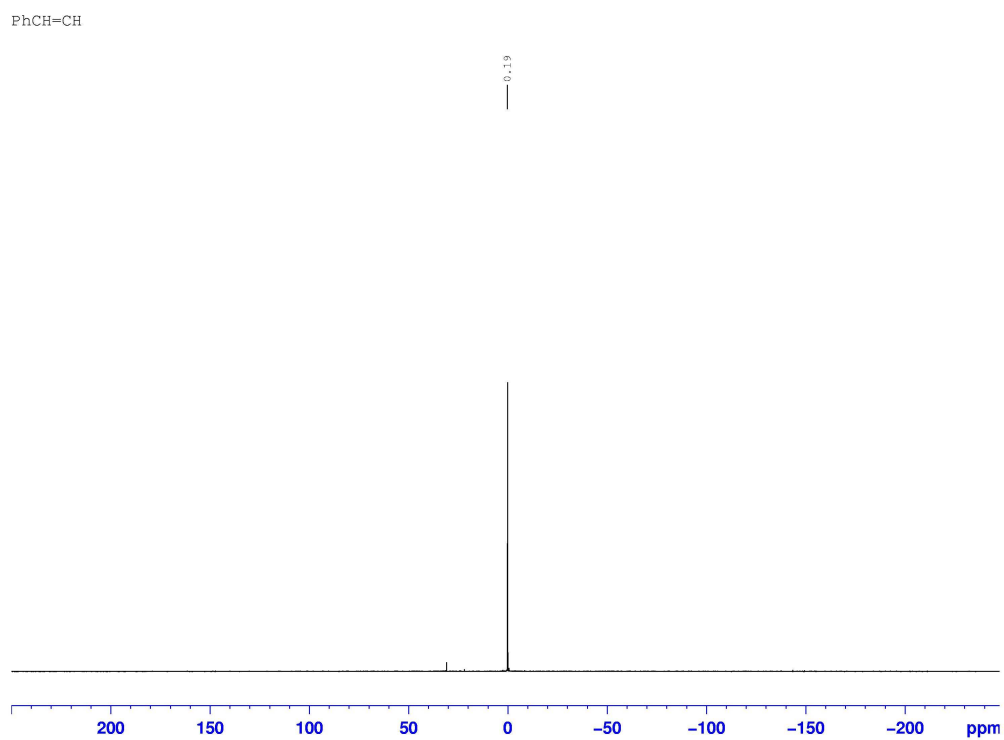

Catalysis: Diethyl Cinnamylidenemalonate + Diphenyl Phosphine..  
 Determination of e.e..  
 -80, DCM, T.E.A..  
 number of scans: 100..

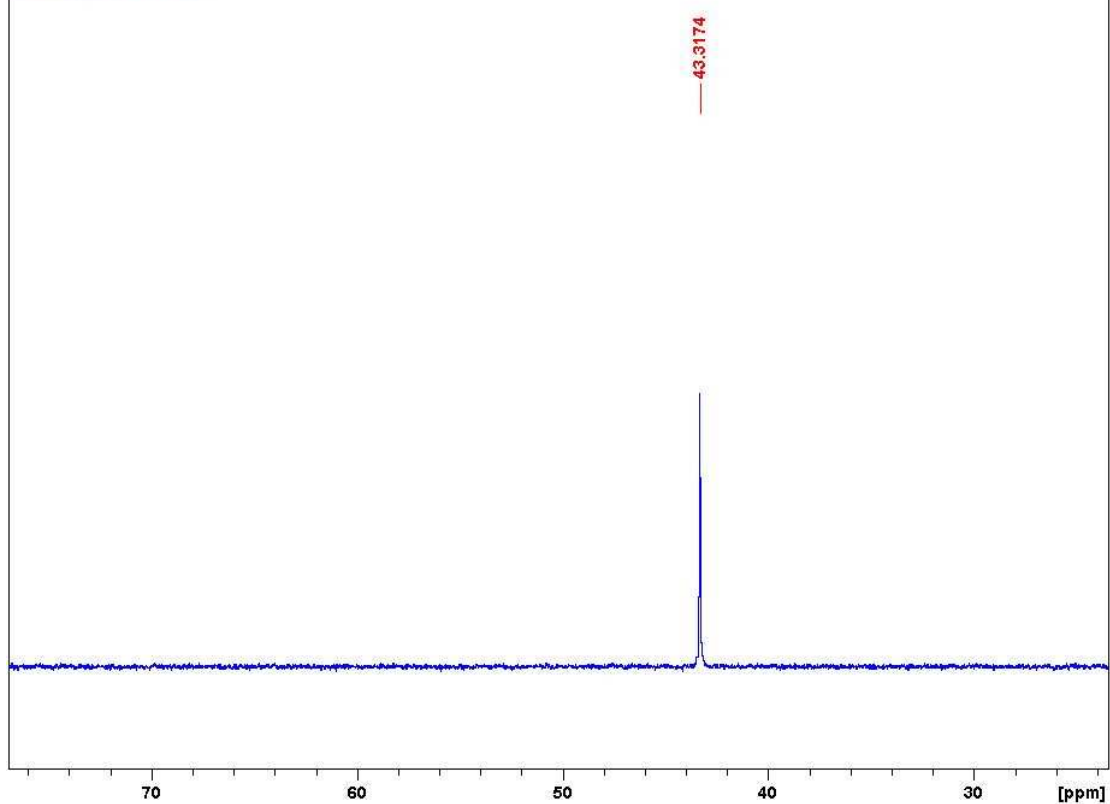

1H: Diethyl Cinnamylidene..

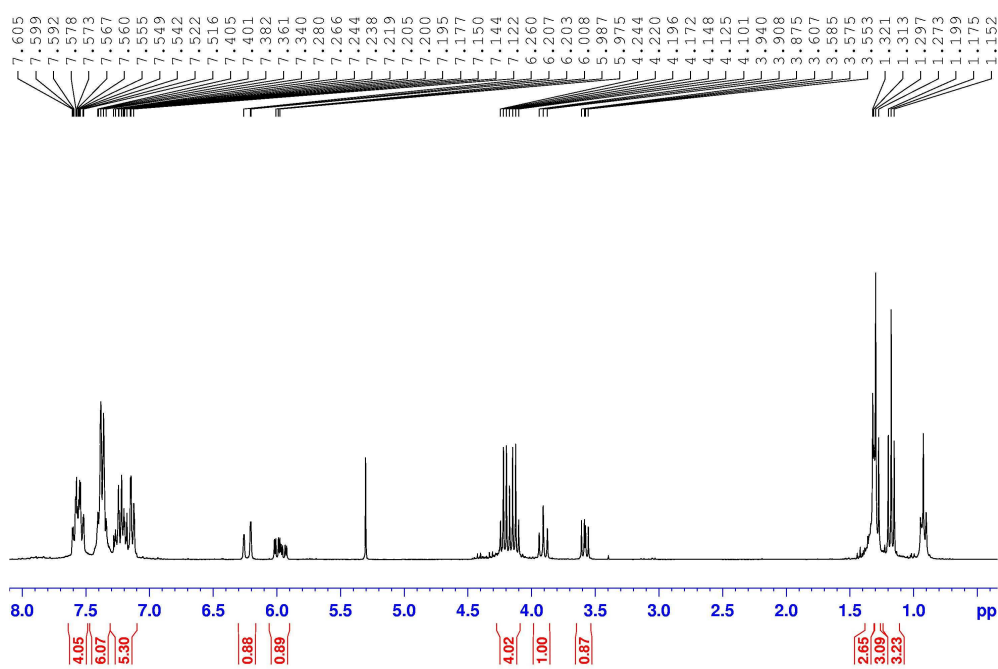

<sup>13</sup>C: Diethyl Cinnamylidene..

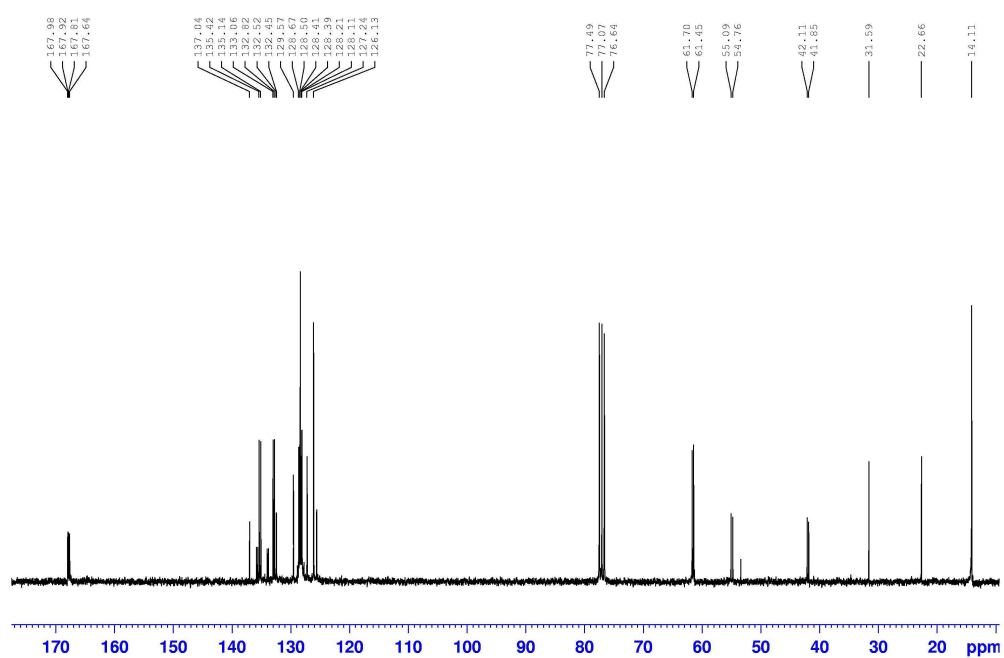

**Crystal data and structure refinement for 7a.**

|                                   |                                                                                                     |
|-----------------------------------|-----------------------------------------------------------------------------------------------------|
| Empirical formula                 | C <sub>40</sub> H <sub>43</sub> I N O <sub>4</sub> P Pd                                             |
| Formula weight                    | 866.02                                                                                              |
| Temperature                       | 103(2) K                                                                                            |
| Wavelength                        | 0.71073 Å                                                                                           |
| Crystal system                    | Orthorhombic                                                                                        |
| Space group                       | P2(1)2(1)2(1)                                                                                       |
| Unit cell dimensions              | a = 9.6549(7) Å      α = 90°.<br>b = 13.8040(10) Å      β = 90°.<br>c = 28.1935(19) Å      γ = 90°. |
| Volume                            | 3757.5(5) Å <sup>3</sup>                                                                            |
| Z                                 | 4                                                                                                   |
| Density (calculated)              | 1.531 Mg/m <sup>3</sup>                                                                             |
| Absorption coefficient            | 1.398 mm <sup>-1</sup>                                                                              |
| F(000)                            | 1744                                                                                                |
| Crystal size                      | 0.40 x 0.04 x 0.04 mm <sup>3</sup>                                                                  |
| Theta range for data collection   | 1.64 to 29.62°.                                                                                     |
| Index ranges                      | -12 ≤ h ≤ 13, -18 ≤ k ≤ 14, -31 ≤ l ≤ 37                                                            |
| Reflections collected             | 21296                                                                                               |
| Independent reflections           | 8971 [R(int) = 0.0781]                                                                              |
| Completeness to theta = 25.00°    | 99.8 %                                                                                              |
| Absorption correction             | Semi-empirical from equivalents                                                                     |
| Max. and min. transmission        | 0.9462 and 0.6047                                                                                   |
| Refinement method                 | Full-matrix least-squares on F <sup>2</sup>                                                         |
| Data / restraints / parameters    | 8971 / 0 / 438                                                                                      |
| Goodness-of-fit on F <sup>2</sup> | 1.006                                                                                               |
| Final R indices [I > 2σ(I)]       | R1 = 0.0557, wR2 = 0.1120                                                                           |
| R indices (all data)              | R1 = 0.1074, wR2 = 0.1495                                                                           |
| Absolute structure parameter      | -0.03(3)                                                                                            |
| Largest diff. peak and hole       | 0.937 and -1.806 e.Å <sup>-3</sup>                                                                  |
